# Supplementary material for: Plasticization and anti-plasticization effects caused by poly(lactide-ran-caprolactone) addition to double crystalline poly(l-lactide)/poly(ε-caprolactone) blends
Source: Royal Society of Chemistry journal article supplement (doi:10.1039/c5ce02559a), 2016-01-01
Supplement: c5ce02559a1.pdf [file c5ce02559a1.pdf]

## Supporting Information

# Plasticization and anti-plasticization effects caused by poly(lactide-*ran*-caprolactone) addition to double crystalline Poly(L-lactide)/Poly( $\epsilon$ -caprolactone) blends.

Matteo Rizzuto<sup>a,c</sup>, Agurtzane Mugica<sup>a</sup>, Manuela Zubitur<sup>b</sup>, Daniele Caretti<sup>c</sup>, Alejandro J. Müller<sup>\*a,d</sup>

## Synthesis of P(LA-*ran*-CL)LMw random copolymer.

P(LA-*ran*-CL)LMw was synthesized, according to the literature,<sup>1</sup> by ring opening polymerization (ROP) of  $\epsilon$ -caprolactone and D,L-lactide and tin(II) octoate. The reaction was carried out overnight in an oil bath at 140 °C and stopped by quenching it in an ice bath. The crude product was dissolved in a minimum volume of CHCl<sub>3</sub>, followed by precipitation into a 10-fold excess of methanol. The copolymers were recovered by filtration and after drying under vacuum.

The analysis of the <sup>1</sup>H-NMR spectrum (Fig S.1) was performed using the work of Peponi *et al.*<sup>2</sup> as reference. The multiplet from 5.05 to 5.25 ppm is assigned to methane proton of polymerized lactide (f). The multiplet from 4.08 to 4.18 ppm is due to the CL proton (a) that linked to LA molecule, while the triplet at 4.05 ppm indicates that the CL proton a linked to another CL molecule.. The multiplet between 2.34 to 2.44 ppm is due to the CL proton (e) that linked to a LA molecule, while the triplet at 2.30 indicates that the CL proton e linked to another CL molecule. For the rest of the spectrum, multiplets at 1.66 ppm and 1.39 ppm are related to the CL protons (b), (d), and (c), respectively, and the multiplet at 1.56 ppm, to the LA methyl protons (g). So, the ratio of the LA signals to the CL signals results in a molar composition of the copolymers.

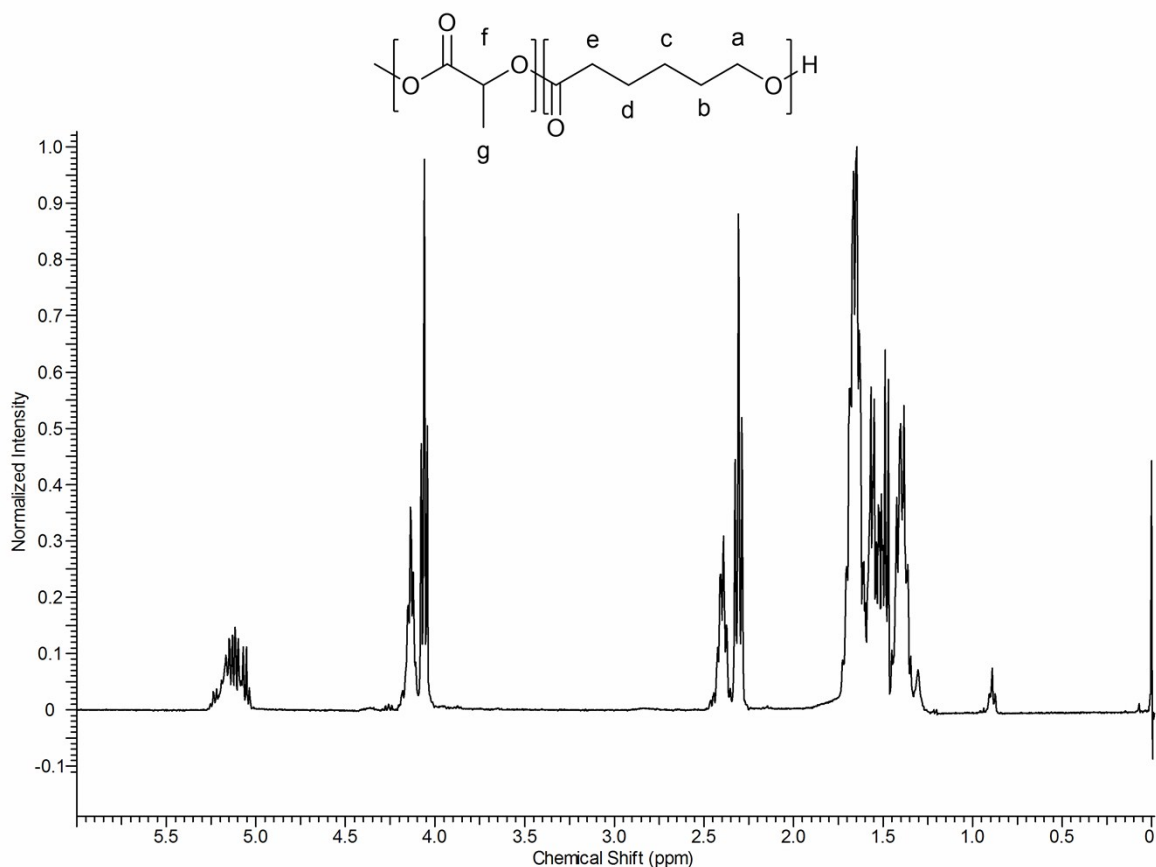

Fig. S.1 <sup>1</sup>H-NMR spectrum and chemical structure of the P(LA-*ran*-CL) random copolymer.

## Avrami Fit

The Avrami Fit was performed using an Origin® software application called *Polymer Crystallization Plugin*. This Origin® plugin was developed by Lorenzo *et al.*<sup>3</sup> The Plugin is offered free upon request by Prof. A.J. Müller.

The data obtained by isothermal Differential Scanning Calorimetry (DSC) tests were used to perform the Avrami Fits and the graphical comparisons between the experimental data and the predictions of the theory. Firstly, it allows the baseline to be established and later calculate the integral of the calorimetric isothermal curve. Secondly, the linear fit according to the Avrami equation and fitting errors can be performed.  $V_c$  (relative volume fraction crystallinity) is calculated according to Ec. 1, whereas  $V_c$  range is selected from 0.03 to 0.20 in order to obtain the best fit within the primary crystallization range.

$$V_c = \frac{W_c}{W_c + \frac{\rho_c}{\rho_a}(1 - W_c)} \quad (1)$$

Where  $\rho_c$  and  $\rho_a$  are the fully crystalline and fully amorphous polymer densities, respectively. For all calculations,  $\rho_a=1.25 \text{ g/cm}^3$  and  $\rho_c=1.359 \text{ g/cm}^3$  were used for PLA. The relative crystalline mass fraction  $W_c$  is calculated as:

$$W_c = \frac{\Delta H(t)}{\Delta H_{total}} \quad (2)$$

Where  $\Delta H(t)$  and  $\Delta H_{total}$  are the enthalpy as a function of crystallization time and the maximum enthalpy after completion of the crystallization process.

Finally, the Avrami equation is rearranged as follows:

$$\log \left[ -\ln \left[ 1 - V_c(t - t_0) \right] \right] = \log(K) + n \log(t - t_0) \quad (3)$$

Where  $n$  is the Avrami index and  $K$  is the overall crystallization rate constant. The experimental and predicted half-crystallization time  $\tau_{50\%}$  can be also determined by this Origin® plugin. According to the Avrami equation,  $\tau_{50\%}$  is:

$$\tau_{50\%} = \left[ -\frac{\ln[1 - V_c]}{K} \right]^{1/n} \quad (4)$$

Then, depending on the goodness of the fit (up to 50% conversion) there may be a difference between the experimental and predicted values of  $\tau_{50\%}$ . The parameters obtained by Avrami Fits are collected in Table S1 (sample of neat PLA), Table S2 (sample PLA/PCL), Table S3 (sample PLA/PCL/P(LA-*ran*-CL)LMw and Table S4 (sample PLA/PCL/P(LA-*ran*-CL)HMw).

**Table S1** Parameters obtained by fitting the Avrami theory to PLA

| $T_c$ | $t_{50\% \text{ theo}}$<br>(min) | $t_{50\% \text{ exp}}$<br>(min) | $n$  | $K$<br>( $\text{min}^{-n}$ ) | $R^2$  | $1/t_{50 \text{ exp}}$<br>( $\text{min}^{-1}$ ) |
|-------|----------------------------------|---------------------------------|------|------------------------------|--------|-------------------------------------------------|
| 130   | 29.029                           | 28.384                          | 3.28 | 1.10E-05                     | 1.0000 | 0.0308                                          |
| 128   | 22.449                           | 22.567                          | 3.59 | 9.73E-06                     | 1.0000 | 0.0402                                          |
| 126   | 21.191                           | 21.234                          | 3.3  | 2.94E-05                     | 1.0000 | 0.0423                                          |
| 124   | 19.715                           | 19.313                          | 3.24 | 4.47E-05                     | 0.9997 | 0.0454                                          |
| 122   | 18.052                           | 17.686                          | 3.23 | 6.01E-05                     | 0.9993 | 0.0493                                          |
| 120   | 16.645                           | 16.317                          | 3.03 | 1.40E-04                     | 0.9995 | 0.0535                                          |
| 118   | 15.856                           | 15.567                          | 3.12 | 1.26E-04                     | 0.9998 | 0.0563                                          |
| 116   | 15.195                           | 14.866                          | 2.97 | 2.12E-04                     | 1.0000 | 0.0580                                          |
| 114   | 15.125                           | 14.717                          | 2.84 | 3.06E-04                     | 0.9999 | 0.0579                                          |
| 112   | 15.837                           | 15.033                          | 2.7  | 3.98E-04                     | 1.0000 | 0.0550                                          |
| 110   | 15.816                           | 15.317                          | 2.68 | 4.21E-04                     | 0.9998 | 0.0550                                          |
| 130   | 29.029                           | 28.384                          | 3.28 | 1.10E-05                     | 0.9998 | 0.0308                                          |
| 128   | 22.449                           | 22.567                          | 3.59 | 9.73E-06                     | 1.0000 | 0.0402                                          |
| 126   | 21.191                           | 21.234                          | 3.3  | 2.94E-05                     | 0.9998 | 0.0423                                          |
| 124   | 19.715                           | 19.313                          | 3.24 | 4.47E-05                     | 0.9997 | 0.0454                                          |

122      18.052      17.686      3.23      6.01E-05      0.9993      0.0493

**Table S2** Parameters obtained by fitting the Avrami theory to PLA/PCL

| $T_c$ | $t_{50\% \text{ theo}}$<br>(min) | $t_{50\% \text{ exp}}$<br>(min) | n    | K<br>( $\text{min}^{-n}$ ) | $R^2$  | $1/t_{50 \text{ exp}}$<br>( $\text{min}^{-1}$ ) |
|-------|----------------------------------|---------------------------------|------|----------------------------|--------|-------------------------------------------------|
| 113   | 8.307                            | 7.733                           | 2.3  | 0.00503                    | 0.9997 | 0.1293                                          |
| 110   | 6.415                            | 5.933                           | 2.36 | 0.00858                    | 0.9993 | 0.1685                                          |
| 107   | 5.049                            | 4.783                           | 2.54 | 0.0114                     | 0.9995 | 0.2091                                          |
| 104   | 3.756                            | 3.684                           | 2.97 | 0.0137                     | 0.9998 | 0.2714                                          |
| 101   | 2.737                            | 2.766                           | 3.81 | 0.0149                     | 1.0000 | 0.3615                                          |
| 98    | 2.271                            | 2.283                           | 3.58 | 0.0367                     | 0.9999 | 0.4380                                          |
| 95    | 2.593                            | 2.633                           | 4.32 | 0.0113                     | 1.0000 | 0.3798                                          |
| 92    | 2.843                            | 2.85                            | 3.8  | 0.0131                     | 0.9998 | 0.3509                                          |
| 89    | 3.62                             | 3.617                           | 3.71 | 0.0059                     | 0.9998 | 0.2765                                          |
| 86    | 5.587                            | 5.633                           | 4.04 | 0.00062                    | 1.0000 | 0.1775                                          |
| 83    | 8.219                            | 8.133                           | 3.6  | 0.000352                   | 0.9998 | 0.1230                                          |

**Table S3** Parameters obtained by fitting the Avrami theory to PLA/PCL/P(LA-ran-CL)LMw

| $T_c$ | $t_{50\% \text{ theo}}$<br>(min) | $t_{50\% \text{ exp}}$<br>(min) | n    | K<br>( $\text{min}^{-n}$ ) | $R^2$  | $1/t_{50 \text{ exp}}$<br>( $\text{min}^{-1}$ ) |
|-------|----------------------------------|---------------------------------|------|----------------------------|--------|-------------------------------------------------|
| 134   | 7.864                            | 8.133                           | 3.1  | 0.00116                    | 0.9999 | 0.1230                                          |
| 131   | 6.473                            | 6.717                           | 3    | 0.00257                    | 1.0000 | 0.1489                                          |
| 129   | 5.932                            | 6.117                           | 2.84 | 0.00443                    | 1.0000 | 0.1635                                          |
| 125   | 4.325                            | 4.45                            | 2.92 | 0.00962                    | 1.0000 | 0.2247                                          |
| 122   | 3.874                            | 3.934                           | 2.63 | 0.0197                     | 1.0000 | 0.2542                                          |
| 119   | 3.635                            | 3.65                            | 2.55 | 0.0257                     | 0.9999 | 0.2740                                          |
| 116   | 3.836                            | 3.867                           | 2.65 | 0.0197                     | 1.0000 | 0.2586                                          |
| 113   | 4.031                            | 4.017                           | 2.54 | 0.02                       | 1.0000 | 0.2489                                          |
| 110   | 3.994                            | 3.833                           | 2.25 | 0.0306                     | 0.9998 | 0.2609                                          |
| 107   | 4.008                            | 3.9                             | 2.3  | 0.0286                     | 1.0000 | 0.2564                                          |
| 104   | 3.784                            | 3.734                           | 2.32 | 0.0315                     | 1.0000 | 0.2678                                          |
| 101   | 3.883                            | 3.75                            | 2.4  | 0.0266                     | 0.9999 | 0.2667                                          |
| 98    | 4.421                            | 4.266                           | 2.42 | 0.0191                     | 0.9999 | 0.2344                                          |
| 95    | 4.942                            | 4.8                             | 2.56 | 0.0117                     | 0.9998 | 0.2083                                          |
| 92    | 5.629                            | 5.567                           | 2.85 | 0.00553                    | 0.9999 | 0.1796                                          |
| 89    | 6.607                            | 6.617                           | 2.99 | 0.00244                    | 0.9998 | 0.1511                                          |

**Table S4** Parameters obtained by fitting the Avrami theory to PLA/PCL/P(LA-ran-CL)HMw

| $T_c$ | $t_{50\% \text{ theo}}$<br>(min) | $t_{50\% \text{ exp}}$<br>(min) | n    | K<br>( $\text{min}^{-n}$ ) | $R^2$  | $1/t_{50 \text{ exp}}$<br>( $\text{min}^{-1}$ ) |
|-------|----------------------------------|---------------------------------|------|----------------------------|--------|-------------------------------------------------|
| 125   | 10,251                           | 10,3                            | 3,4  | 0,000253                   | 1,0000 | 0,0971                                          |
| 122   | 5,121                            | 5,184                           | 3,09 | 0,00448                    | 1,0000 | 0,1929                                          |
| 119   | 3,057                            | 3,133                           | 3,09 | 0,022                      | 1,0000 | 0,3192                                          |
| 116   | 1,999                            | 2,05                            | 3,14 | 0,078                      | 1,0000 | 0,4878                                          |
| 113   | 1,526                            | 1,583                           | 3,7  | 0,145                      | 1,0000 | 0,6317                                          |
| 110   | 1,344                            | 1,4                             | 3,47 | 0,248                      | 1,0000 | 0,7143                                          |
| 107   | 1,414                            | 1,415                           | 4,31 | 0,156                      | 1,0000 | 0,7067                                          |
| 104   | 1,38                             | 1,4                             | 3,88 | 0,199                      | 0,9998 | 0,7143                                          |
| 101   | 1,491                            | 1,516                           | 3,95 | 0,143                      | 0,9999 | 0,6596                                          |
| 98    | 1,645                            | 1,633                           | 3,44 | 0,125                      | 0,9996 | 0,6124                                          |
| 95    | 1,711                            | 1,667                           | 3,04 | 0,136                      | 0,9996 | 0,5999                                          |
| 92    | 2,198                            | 2,134                           | 2,92 | 0,0695                     | 0,9996 | 0,4686                                          |
| 89    | 3,121                            | 3,017                           | 2,89 | 0,00844                    | 0,9996 | 0,3315                                          |

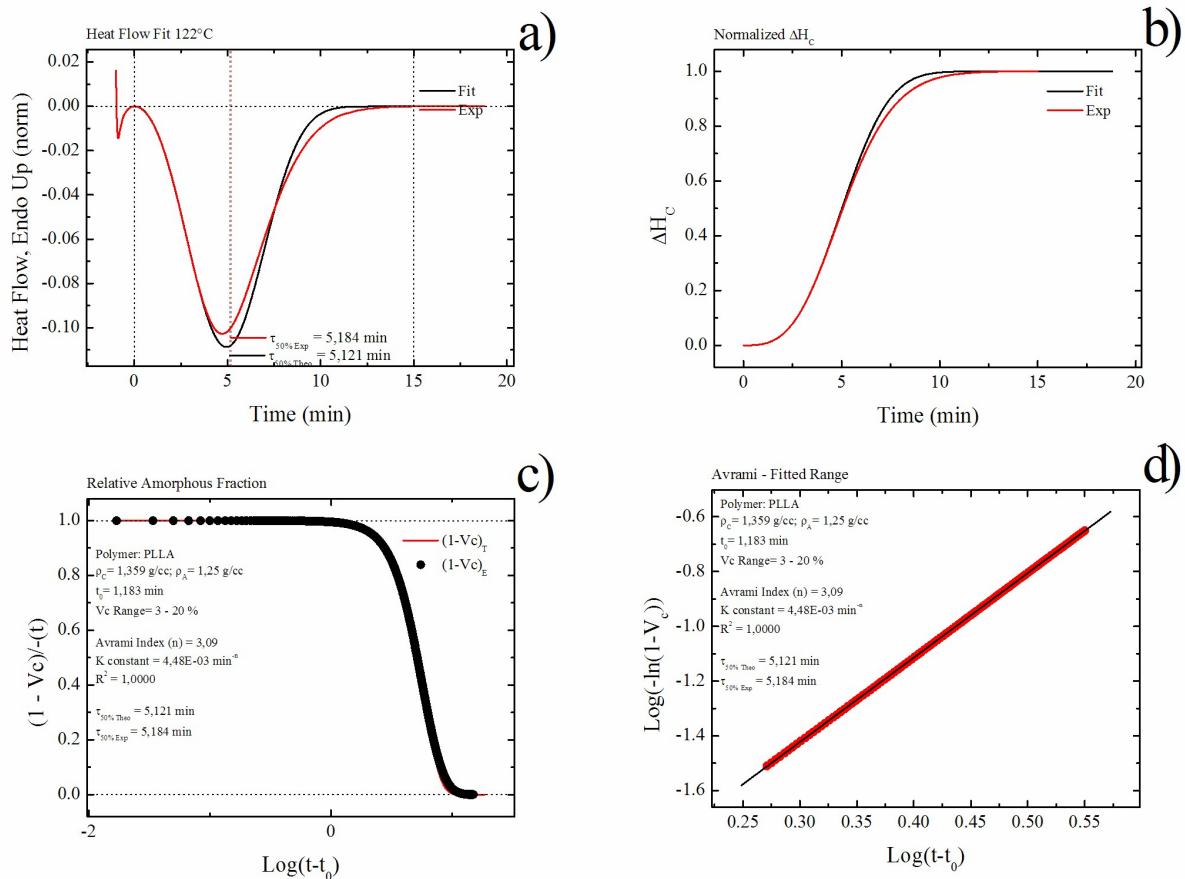

**Fig. S2** Avrami plots obtained by the Origin® plugin developed by Lorenzo *et al.* (a) Experimental DSC crystallization isotherm of PLA/PCL/P(LA-ran-CL)HMw at 122°C and its fitting with the Avrami equation. The experimental crystallization half-time is indicated. (b) Relative enthalpy of crystallization (Ec. 2) as a function of time. (c) Evolution of the normalized volumetric fraction of the amorphous phase as a function of crystallization time. (d) Linear fitting of the Avrami equation in the primary crystallization range, where the slope indicates the Avrami index and the intercept the overall crystallization rate constant.

## References

1. J. Odent, P. Leclère, J.-M. Raquez and P. Dubois, *European Polymer Journal*, 2013, 49, 914-922.
2. L. Peponi, A. Marcos-Fernández and J. M. Kenny, *Nanoscale Research Letters*, 2012, 7, 1-7.
3. A. T. Lorenzo, M. L. Arnal, J. Albuérne and A. J. Müller, *Polymer Testing*, 2007, 26, 222-231.
